# Supplementary material
Source: Springer Nature journal article supplement (https://www.springermedizin.de/resource/supplementary/13033_2012_122_MOESM2_ESM.pdf/9651878)
Supplement: MOESM2 [file 9651878]

Day Stay Program Offered (children < 12 months)  
n=484 (Intake records)

Not invited  
n=222

Invited to participate in study<sup>§</sup>  
n=262/484 (54%)

Did not attend the DSP  
estimated n=100 (38%)

Invited to participate and attended  
DSP n=162

Declined participation  
n=46

Participated  
n=116/162 (72%)

Withdrew/Lost to contact  
n=13 (11%)

Completed follow-up  
n=103 (89%)

<sup>§</sup>Invited to participate excludes n=24 for whom no pack details were recorded and n=2 not eligible (baby too old); includes n=30 who received pack on day of attendance.
